# Supplementary material for: Risk Factors of Inadequate Bowel Preparation for Screening Colonoscopy
Source: MDPI journal article supplement (doi:10.3390/jcm10122740), 2021-06-21
Supplement: s1 [file s1]

**Supplementary Table S1: Previous studies assessing risk factors for inadequate bowel preparation.**

|   | First author/<br>Pub. Year/<br>Country                             | Recruitment<br>years                          | Number of participants |                                    | Recruitment<br>setting                                                     | Risk factors associated with poor bowel<br>preparation (OR, 95%CI)                                                                                                                                                                                                                                   |
|---|--------------------------------------------------------------------|-----------------------------------------------|------------------------|------------------------------------|----------------------------------------------------------------------------|------------------------------------------------------------------------------------------------------------------------------------------------------------------------------------------------------------------------------------------------------------------------------------------------------|
|   |                                                                    |                                               | Total                  | Inadequate<br>bowel<br>preparation |                                                                            |                                                                                                                                                                                                                                                                                                      |
| 1 | Hyun 2018,<br>Korea<br>doi:10.3393/ac.<br>2018.03.13<br>[11]       | 2012-2014                                     | 1079                   | 422 (39.1%)                        | Screening                                                                  | BMI > 25 (1.42, 1.11-1.85)                                                                                                                                                                                                                                                                           |
| 2 | Fayad 2013,<br>USA<br>doi:10.1016/j.cg<br>h.2013.05.037<br>[8]     | 2009                                          | 2163                   | 956 (44%)                          | Screening<br>(34.6%),<br>surveillance<br>(34.1%),<br>diagnostic<br>(31.3%) | BMI ≥30 (1.46, 1.21-1.75)<br>Use of tobacco (1.28, 1.07-1.54)<br>Narcotics (1.28, 1.04-1.57)<br>Hypertension (1.30, 1.07-1.57)<br>Diabetes (1.38, 1.12-1.69)<br>Dementia (3.02, 1.22-7.49)                                                                                                           |
| 3 | Hassan 2012,<br>Italy<br>doi:10.1016/j.cg<br>h.2011.12.037<br>[12] | 2010                                          | 2811                   | 925 (32.9%)                        | Screening<br>(13.7%) and<br>doctor referral                                | Liver cirrhosis (5.0, 2.6–10.4)<br>Parkinson disease (3.2, 1.2–9.3)<br>Diabetes (1.8, 1.3–2.5)<br>Previous colorectal surgeries (1.6, 1.2–2.2)<br>Male sex (1.2, 1.02–1.5)<br>BMI ( <i>1 point incr.</i> ) (1.1, 1.03–1.1)<br>Age ( <i>1 year incr.</i> ) (1.01, 1.004–1.02)                         |
| 4 | Lebwohl 2010,<br>USA<br>doi:10.1007/s10<br>620-009-1079-7<br>[13]  | 2006-2008<br>(endoscopy<br>database<br>query) | 10,921*                | 2,389 (21.9%)                      | Screening (36%),<br>diagnostic and<br>surveillance                         | Age 70-79 (1.23, 1.07-1.42)<br>Male sex (1.44, 1.31-1.59)<br>Inpatient (1.51, 1.26-1.80)<br>After 11:00am (1.89, 1.71-2.09)                                                                                                                                                                          |
| 5 | Borg 2009,<br>USA<br>doi:10.1016/j.cg<br>h.2009.02.014.<br>[14]    | 2007<br>(computerized<br>record query)        | 1588                   | 624 (39.3%)                        | Outpatient and<br>inpatient.<br>Screening and<br>surveillance<br>(58.4%)   | BMI ≥25 (1.28, 1.01–1.61)<br>Male gender (1.36, 1.10–1.61)<br>Inpatient status (1.54, 1.11–2.13)<br>Smoking status (1.31, 1.03–1.67)<br>Antidepressant use (1.67, 1.22–2.29)<br>Narcotic use (2.06, 1.30–3.25)<br>Diabetes mellitus (1.37, 1.05–1.78)<br>Decreased mental capacity (2.17, 1.06–4.45) |

\*Lebwohl et al – number of participants with recorded quality of bowel preparation.
